# Supplementary material for: White light-emitting properties of NaGdF4nanotubes through Tb3+, Eu3+doping
Source: Royal Society of Chemistry journal article supplement (doi:10.1039/c5ce01118c), 2015-01-01
Supplement: c5ce01118c1.pdf [file c5ce01118c1.pdf]

# Electronic Supplementary Information

## White light-emitting properties of NaGdF<sub>4</sub> nanotubes through Tb<sup>3+</sup>, Eu<sup>3+</sup> doping

Lu Liu, Yimai Liang, Linlin Li, Lianchun Zou,\* Shucaï Gan\*

*College of Chemistry, Jilin University, Changchun 130026, P. R. China. \*Corresponding author: Shucaï Gan; Tel: +86 431 88502259; E-mail address: [gansc@jlu.edu.cn](mailto:gansc@jlu.edu.cn) (S. Gan) [zoulianchun@126.com](mailto:zoulianchun@126.com)*

**Figure S1** Powder XRD patterns of the  $\text{NaGdF}_4:0.04\text{Tb}^{3+},x\text{Eu}^{3+}$  and the standard reference pattern of  $\text{NaGdF}_4$  (JCPDS#00-027-0699):  $x = 0$  (a),  $x = 0.01$  (b),  $x = 0.03$  (c),  $x = 0.05$  (d), and  $x = 0.07$  (e). Revealing the successful doping of  $\text{Ln}^{3+}$  ( $\text{Ln} = \text{Eu}, \text{Tb}$ ) into  $\text{NaGdF}_4$  host.

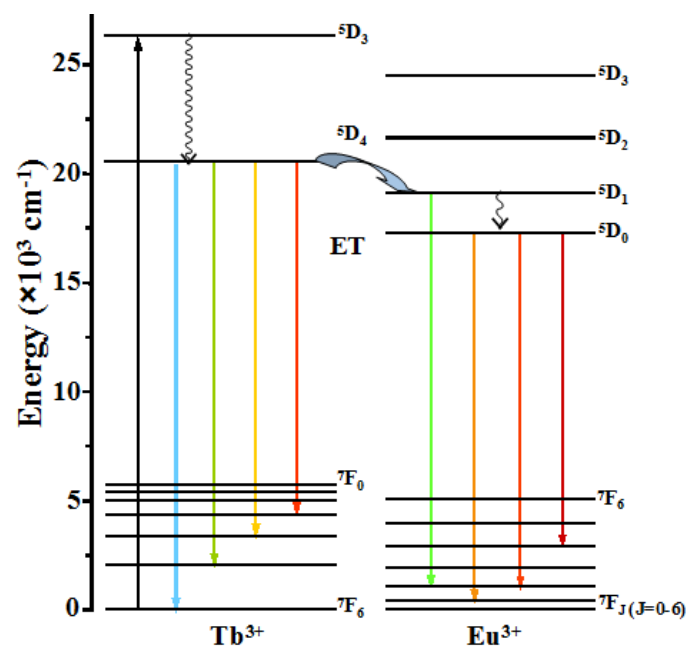

**Figure S2** Energy level scheme representing the energy transfer and energy transfer mechanism in the  $\text{Tb}^{3+}, \text{Eu}^{3+}$ -codoped  $\text{NaGdF}_4$  phosphors.
